# Supplementary material for: Structural and electronic engineering of biomass-derived carbon nanosheet composite for electrochemical oxygen reduction
Source: Royal Society of Chemistry journal article supplement (doi:10.1039/d0se01631d), 2021-01-01
Supplement: d0se01631d1.pdf [file d0se01631d1.pdf]

## Supporting information

### **Structural and electronic engineering of biomass-derived carbon nanosheets for electrochemical oxygen reduction**

Kristina Maliutina<sup>a,b</sup>, Changjie He<sup>a</sup>, Jiajia Huang<sup>a</sup>, Jianglong Yu<sup>c</sup>, Fengjiao Li<sup>a</sup>, Chuanxin He<sup>a</sup>,  
Liangdong Fan<sup>a,d\*\*</sup>

<sup>a</sup>College of Chemistry and Environmental Engineering, Shenzhen University, Shenzhen 518060,  
Guangdong, China

<sup>b</sup>College of Physics and Optoelectronic Engineering, Key Lab of Optoelectronic Devices and  
Systems of Ministry of Education/Guangdong Province, Shenzhen University, Shenzhen 518060,  
Guangdong, China.

<sup>c</sup>Department of Chemical Engineering, University of Newcastle, Callaghan, NSW 2308,  
Australia

<sup>d</sup>Shenzhen Key Laboratory of New Lithium-ion Batteries and Mesoporous Materials, Shenzhen  
University, Shenzhen 518060, Guangdong, China.

Number of figures: 13

Number of tables: 4

---

\*Corresponding author: [fanld@szu.edu.cn](mailto:fanld@szu.edu.cn) (Fan L.D.)

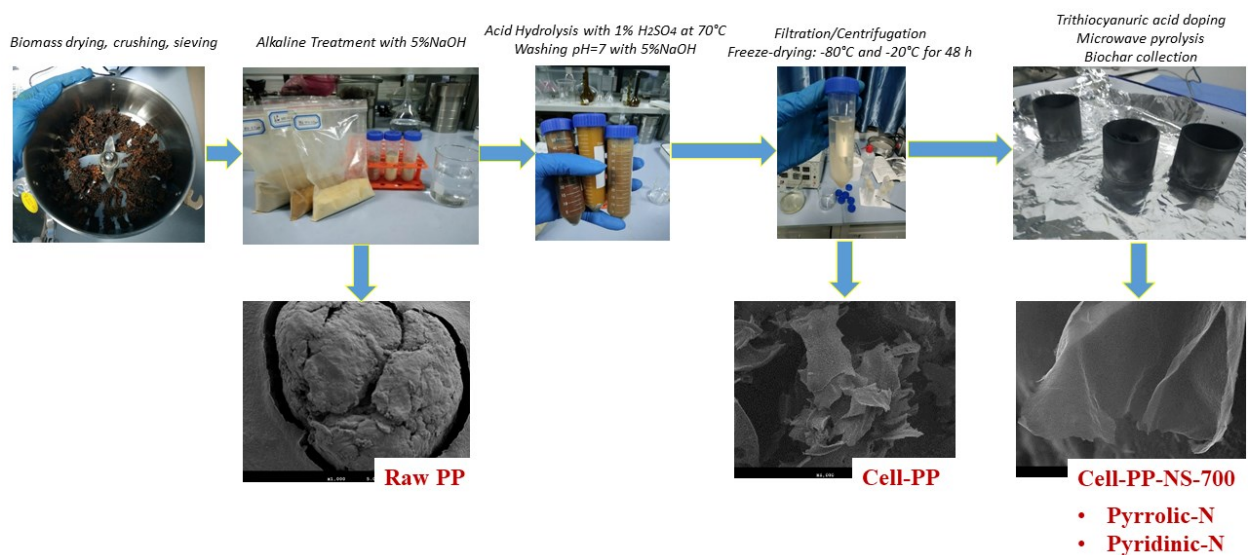

**Fig. S1.** Detailed diagram of the pretreatment process for the production of the cell-PP-NS-700 biochar precursor.

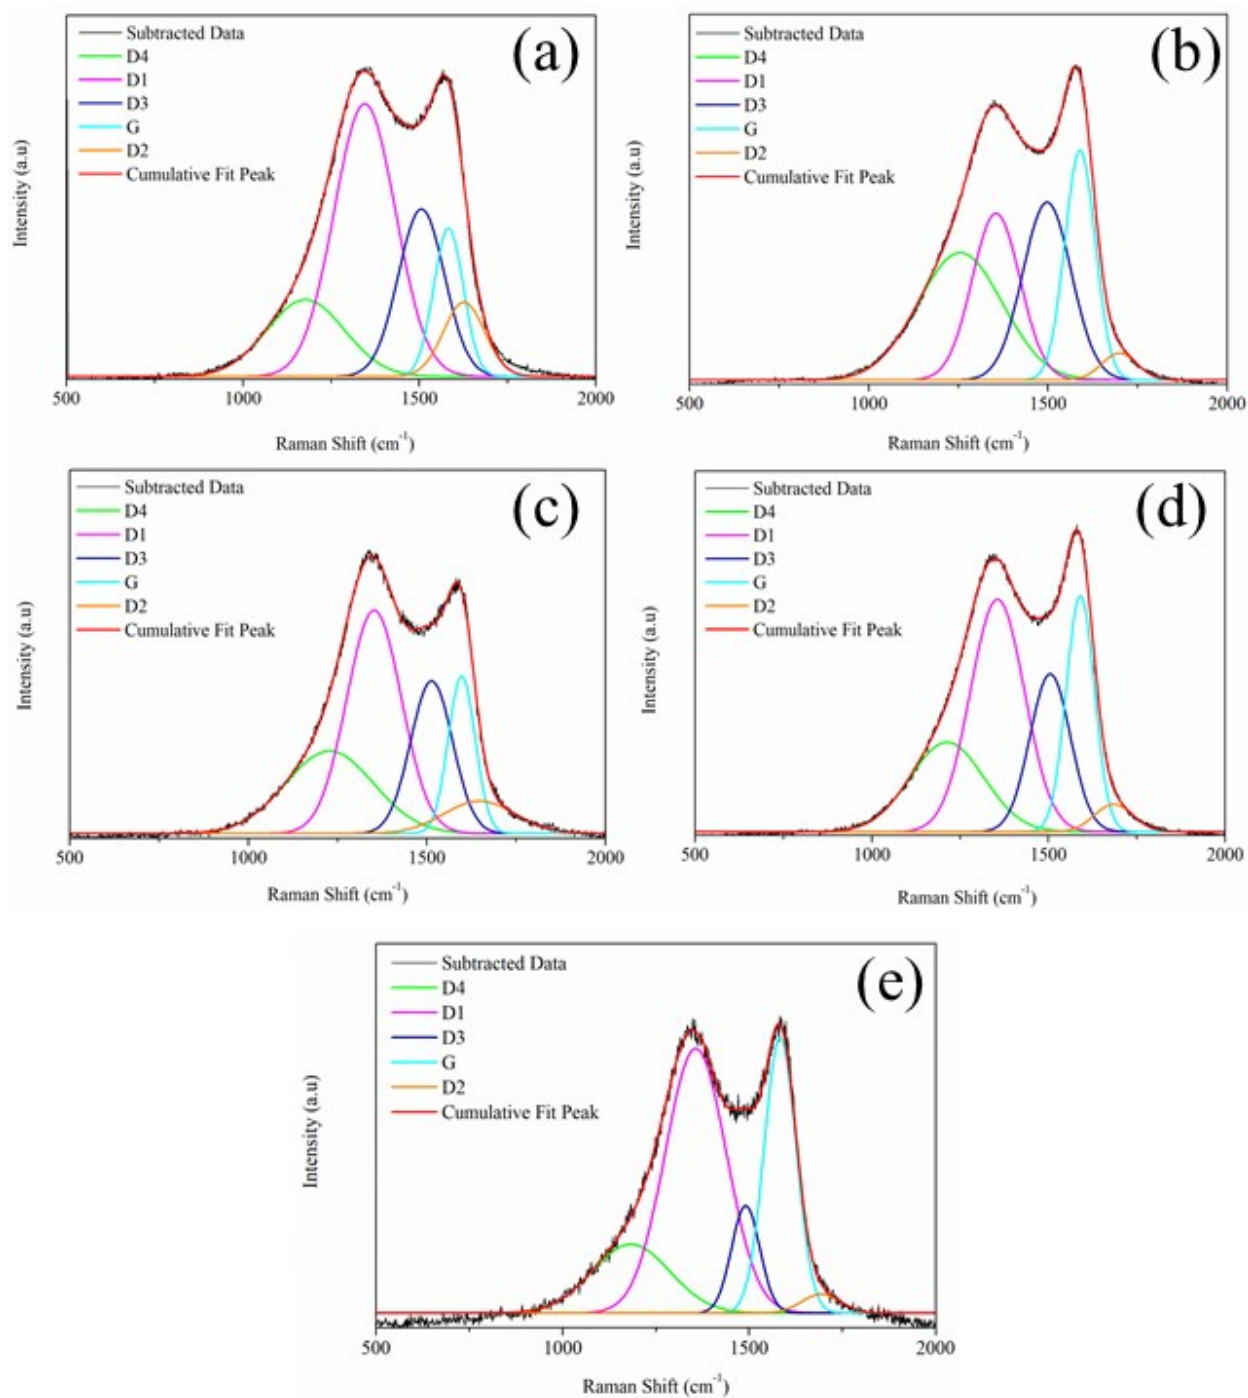

**Fig. S2.** Curve-fitted Raman spectra, corresponding to (a) Raw PP, (b) cell-PP, (c) cell-PP-NS-700, (d) cell-PP-NS-700-Ta and (e) cell-PP-NS-700-Ta-900 samples.

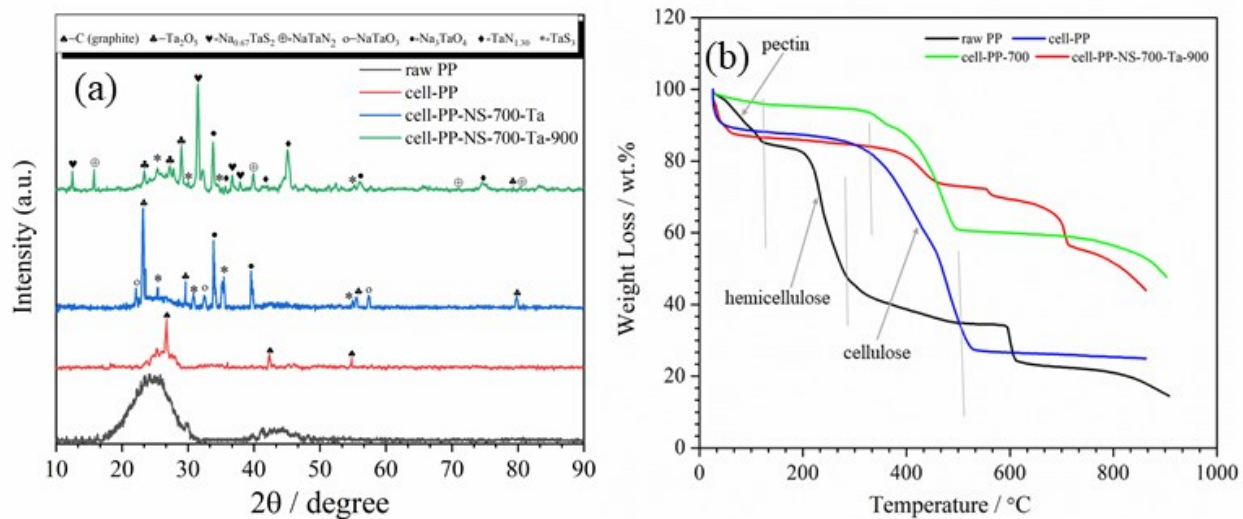

**Fig. S3.** The normalized spectrum of (a) XRD patterns and (b) TG decomposition curves in air atmosphere of the catalyst precursor and as-prepared catalysts.

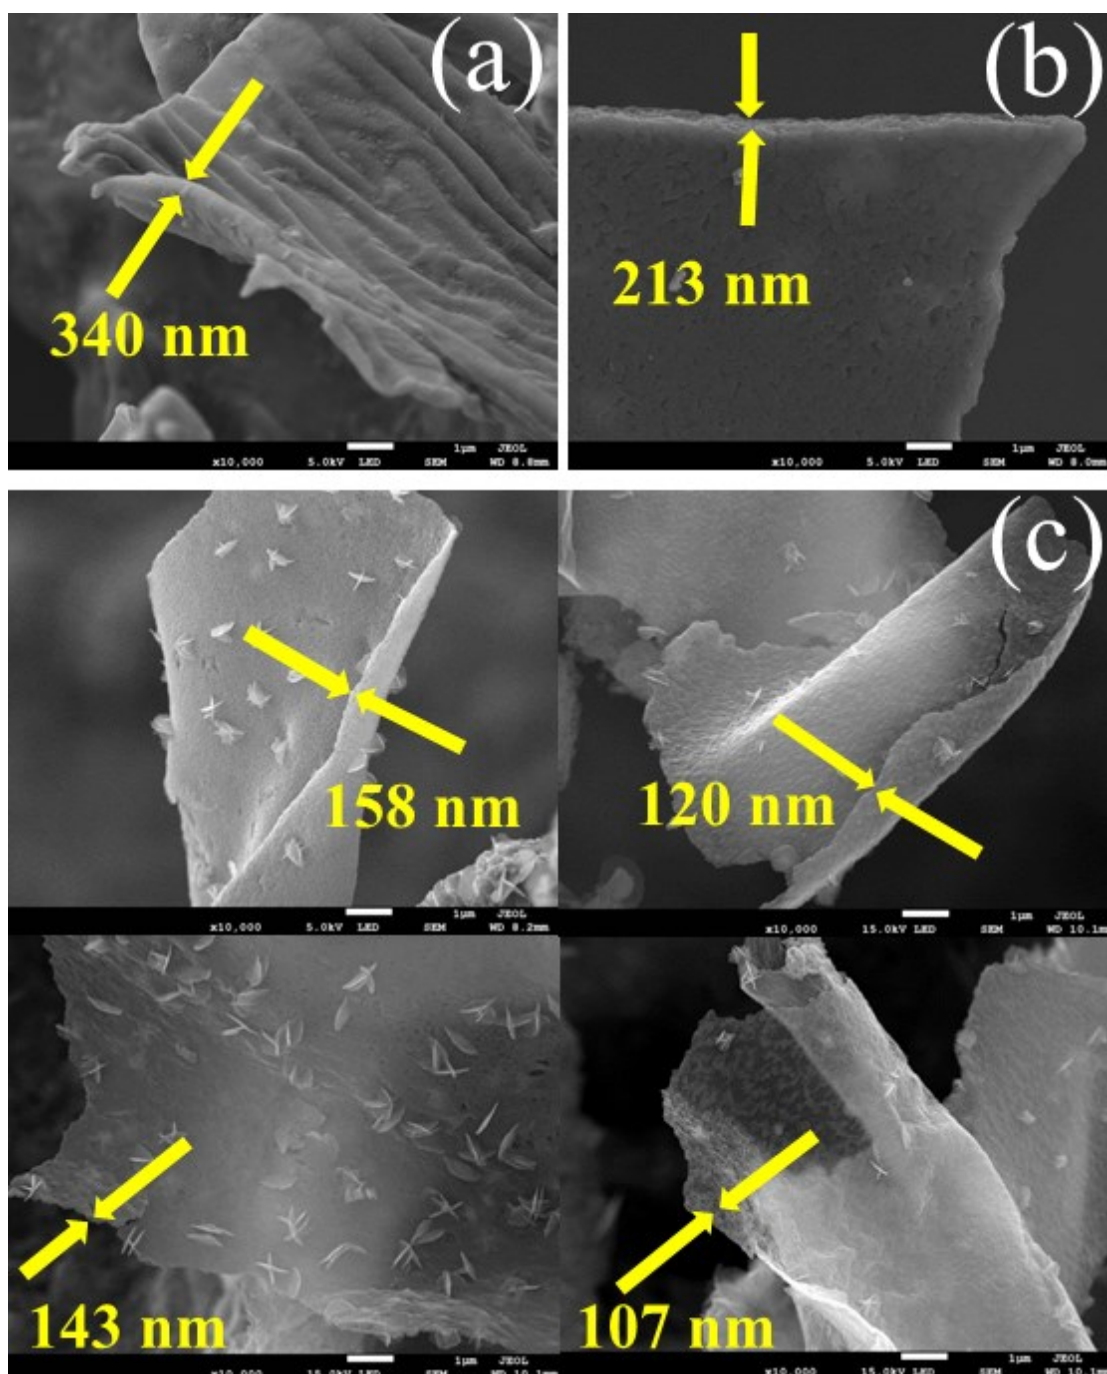

**Fig. S4.** Variety of FE-SEM images for representative nanosheet-like samples of (a) cell-PP; (b) cell-PP-NS-700; (c) cell-PP-NS-700-Ta-900.

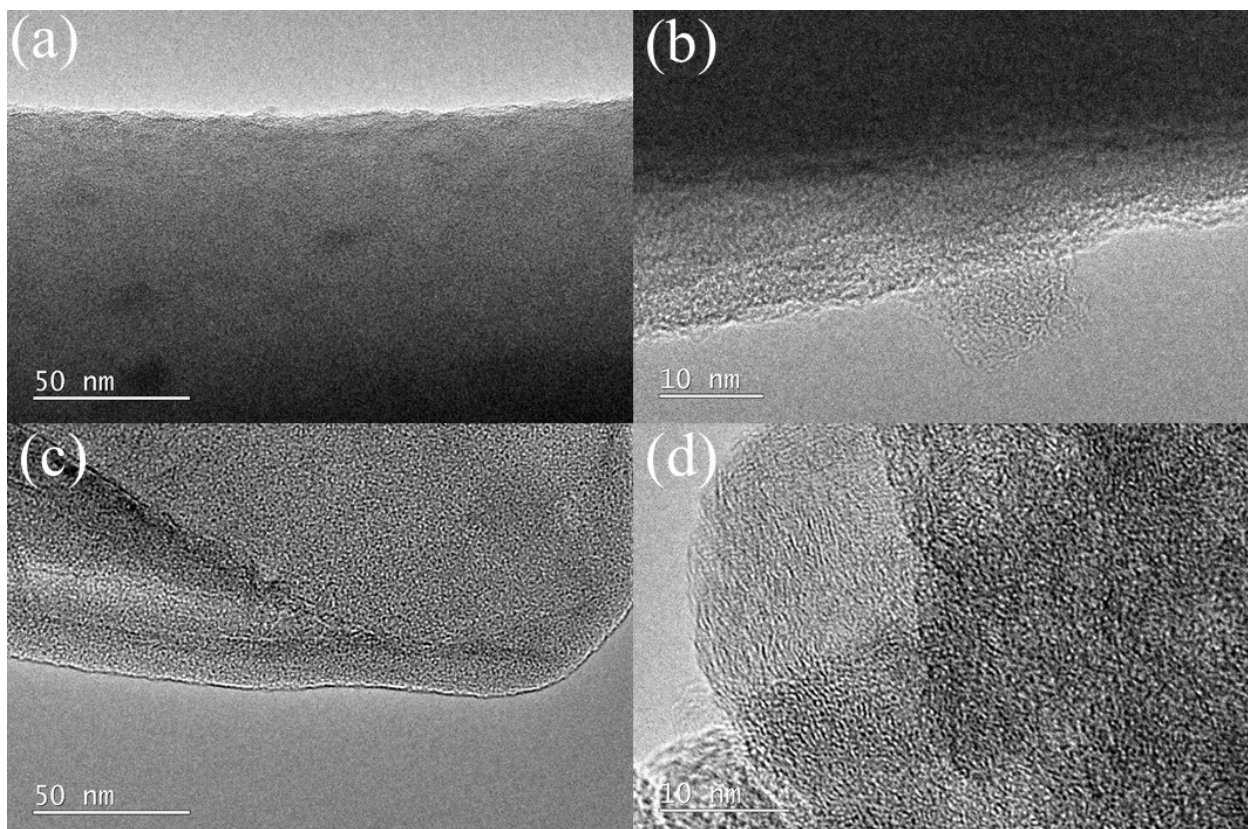

**Fig. S5.** TEM images of (a,b) cell-PP-700 and (c,d) cell-PP-NS-700 samples corresponding for porosity at different magnifications.



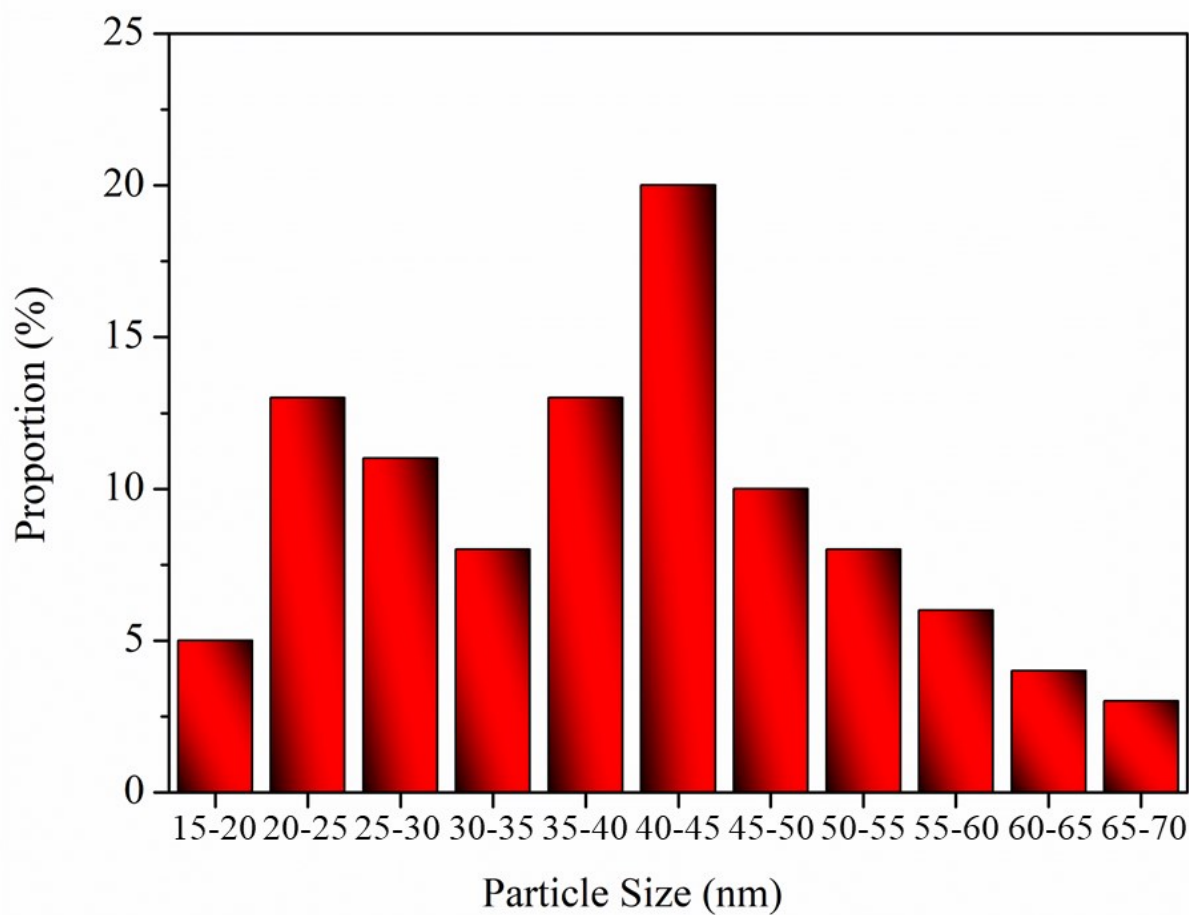

**Fig. S6.** The particle size distribution of the Ta-based nanoparticles on the cell-PP-NS-700-Ta-900 nanosheet electrocatalyst

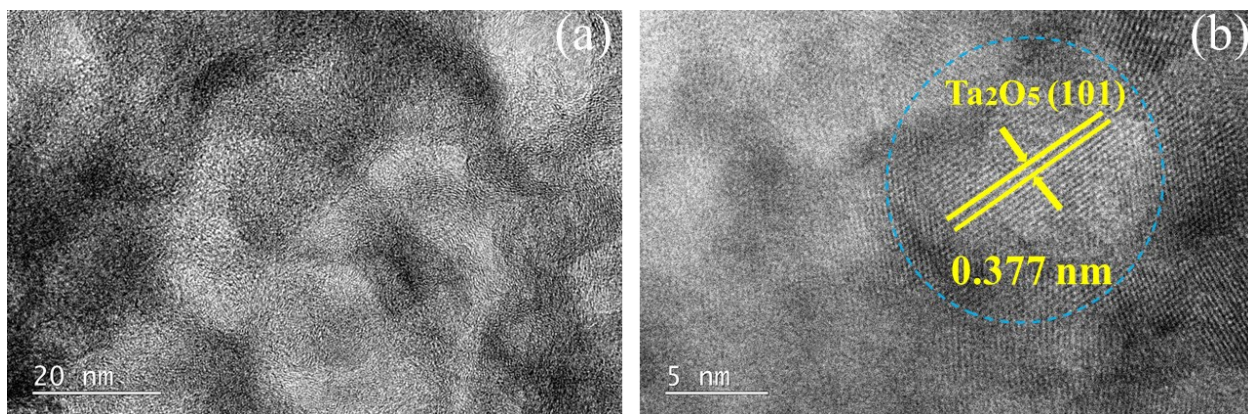

**Fig. S7.** TEM image (a) and magnified HR-TEM images (b) of the cell-PP-700-Ta-900 catalyst.



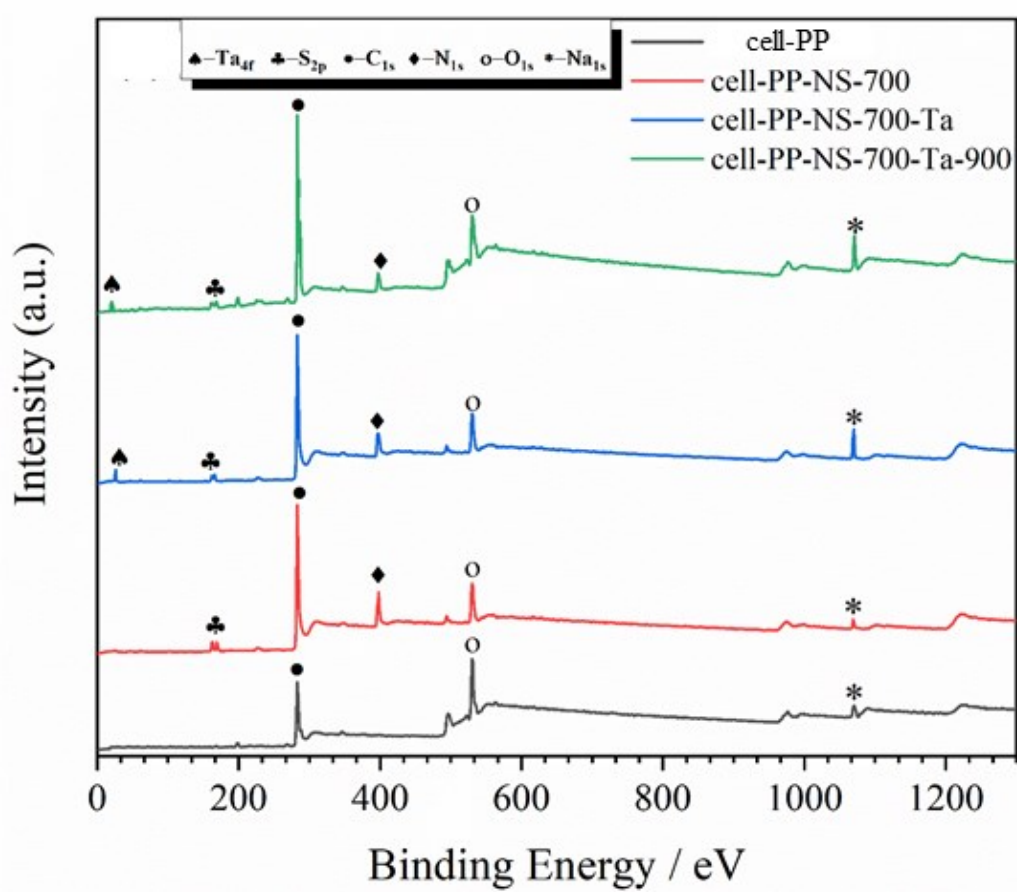

**Fig. S8.** The normalized spectrum of XPS survey for cell-PP precursor and as-prepared catalysts.

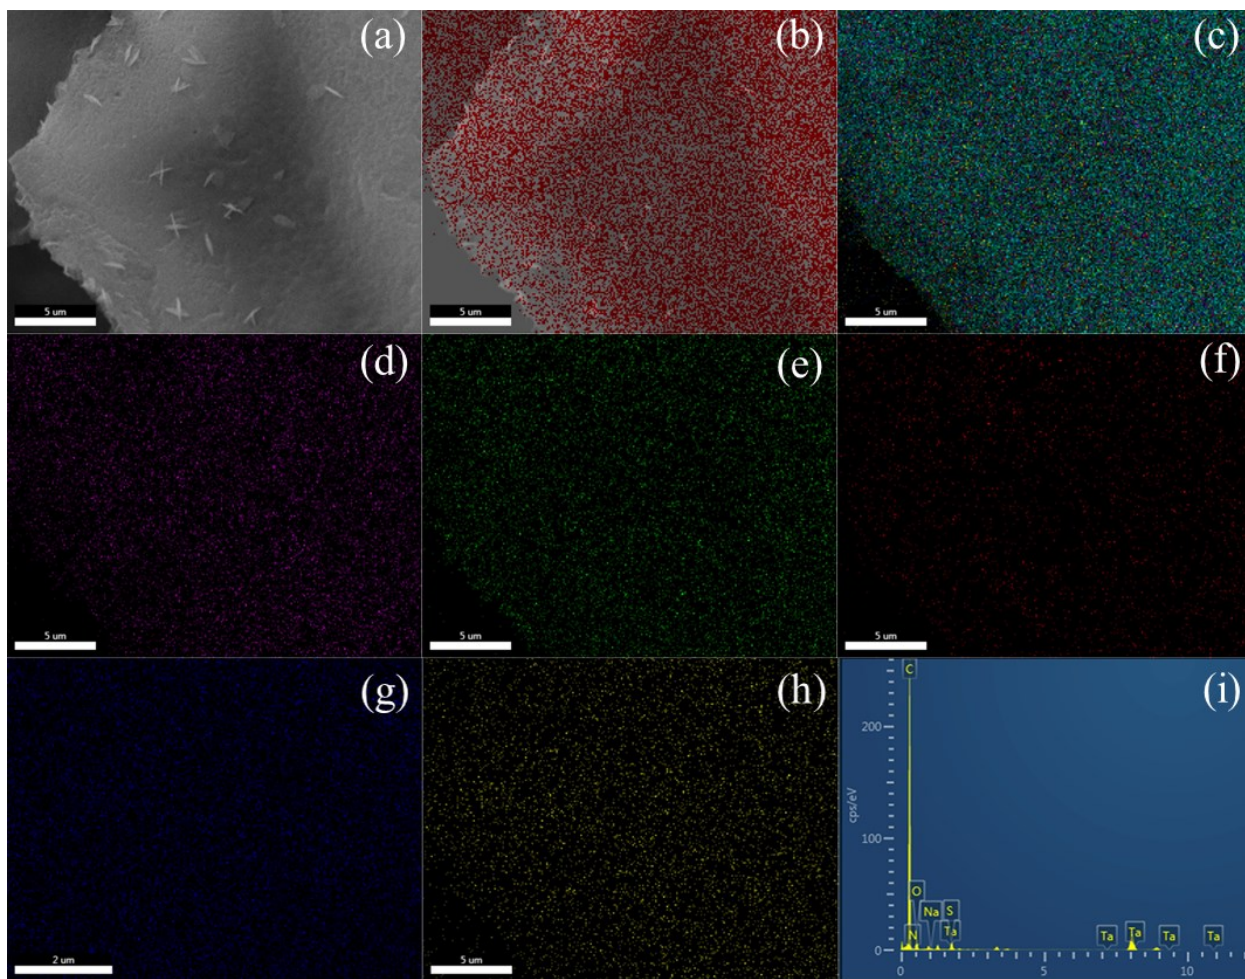

**Fig. S9.** SEM-EDAX analysis for cell-PP-NS-700-Ta-900 catalyst with corresponding images of (a) SEM micrograph of the scanned area; (b) the survey spectra of the EDAX-mapping for all the elements, (c) C, (d) N, (e) O, (f) Na, (g) Ta, (h) S and (i) the EDAX spectra for the cell-PP-NS-700-Ta-900 catalyst.

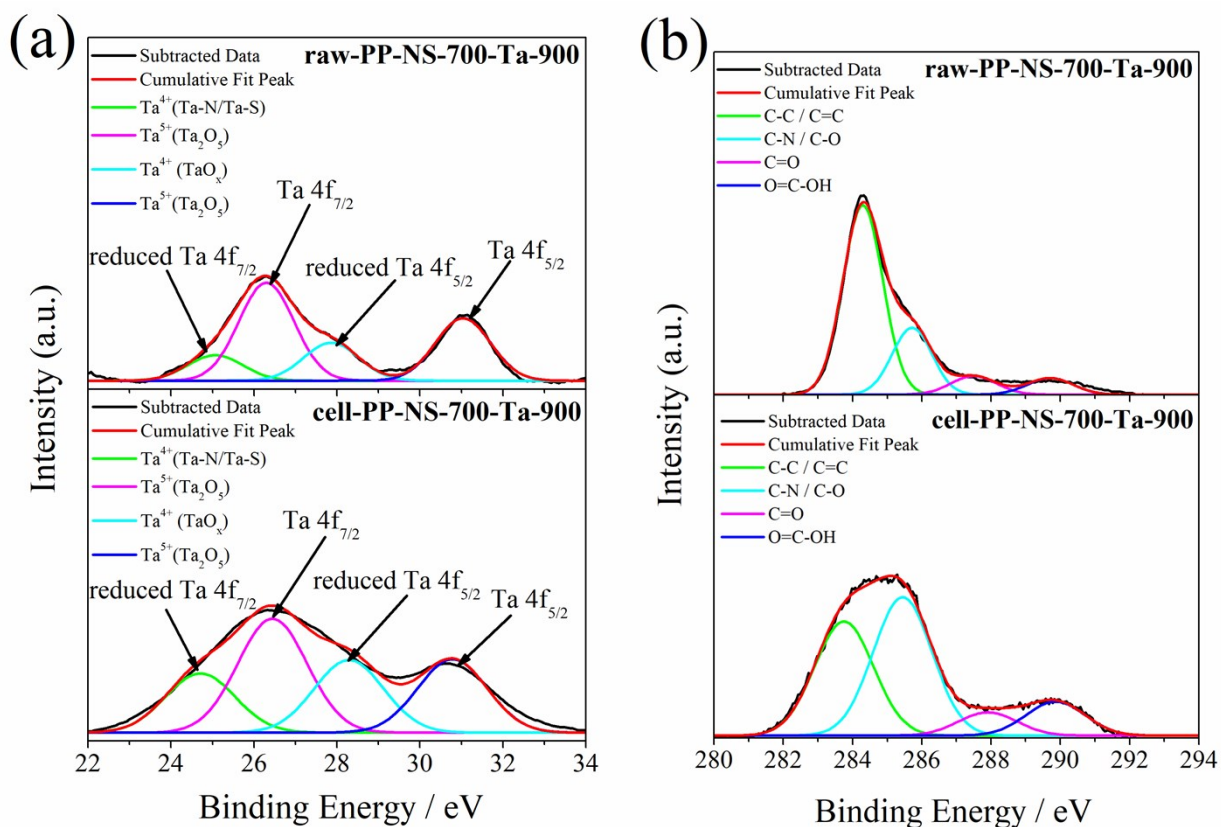

**Fig. S10.** XPS high-resolution curve-fitting spectra for the raw-PP-NS-700-Ta-900 and cell-PP-NS-700-Ta-900 samples attributed to (a) Ta 4f and (b) C 1s patterns.

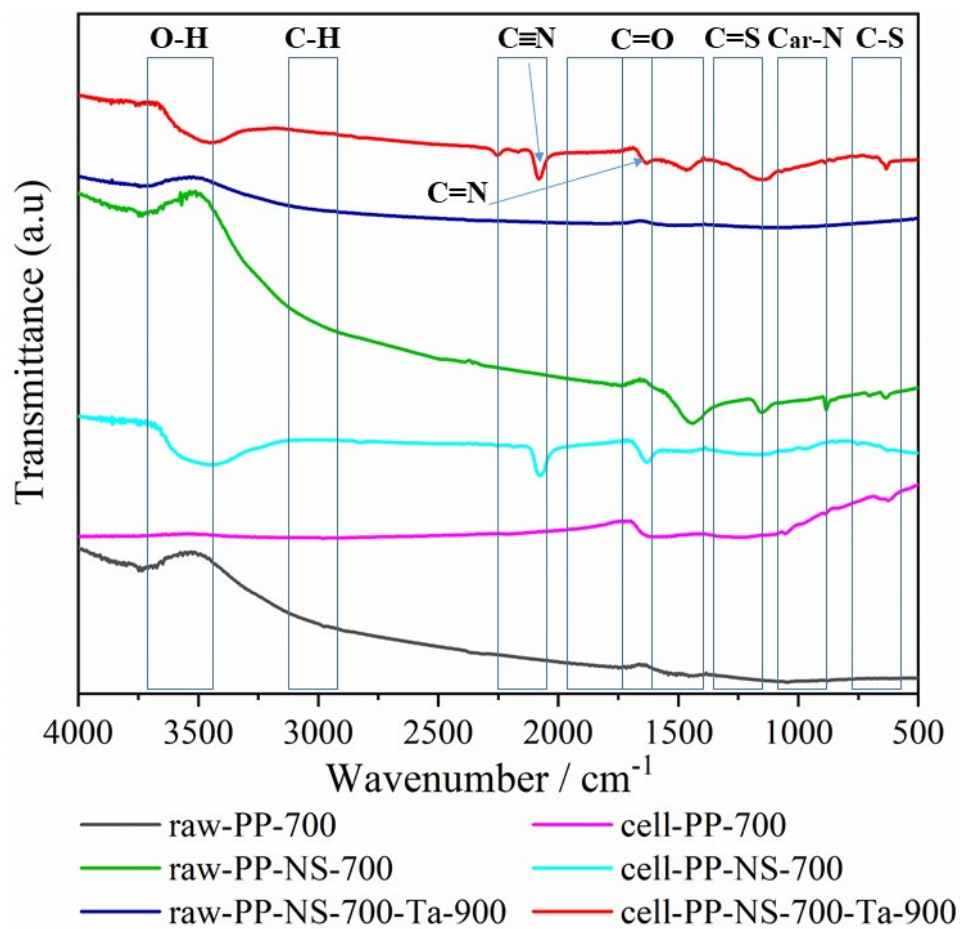

**Fig. S11.** Normalized FT-IR spectra of the raw PP bio-char, pretreated cell-PP bio-char and as-prepared catalysts.

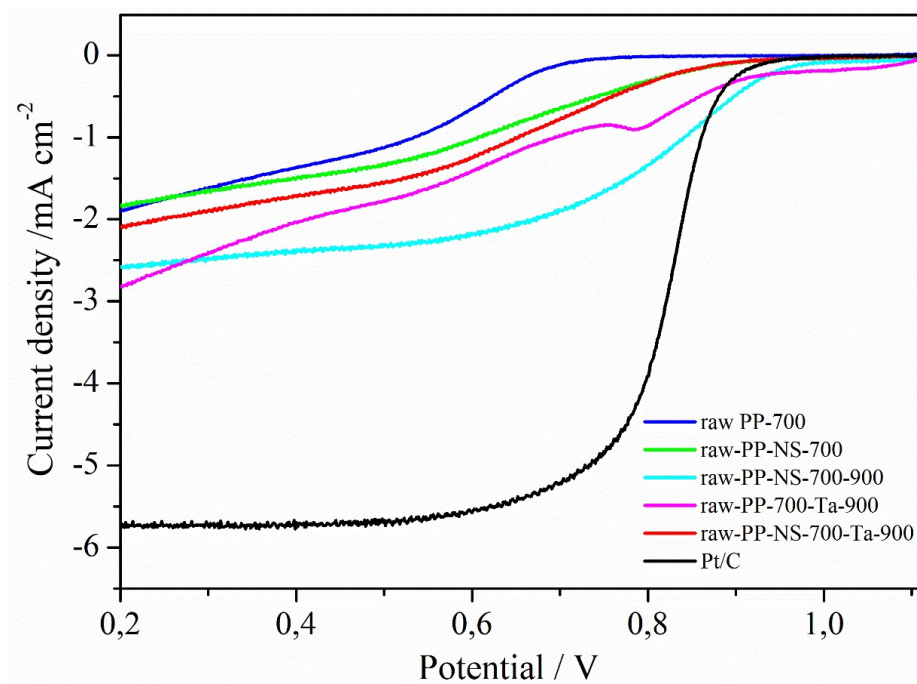

**Fig. S12.** RDE polarization curves for the series of raw-PP biomass-derived catalysts performed in O<sub>2</sub> saturated 0.1 M KOH with a scanning rate of 5 mV s<sup>-1</sup>.



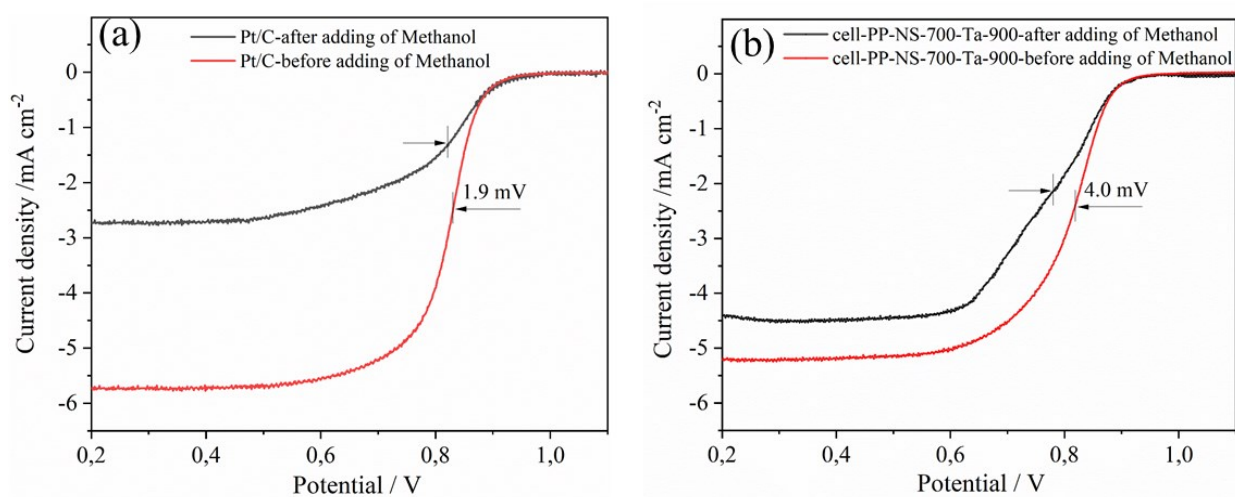

**Fig. S13.** LSV curves in O<sub>2</sub> saturated 0.1 M KOH at 5 mV s<sup>-1</sup> and 1600 rpm before and after methanol poisoning for Pt/C (a) and cell-PP-NS-700-Ta-900 (b).



**Table S1.** The main functional bands determined by the Raman spectroscopy

| <b>Band</b> | <b>Raman shift (cm<sup>-1</sup>)</b> | <b>Vibration mode</b>                                                                                                           |
|-------------|--------------------------------------|---------------------------------------------------------------------------------------------------------------------------------|
| D4          | ~1150-1180                           | C–C and C=C stretching vibrations of the disordered graphitic frame (polyene-like structures, and/or ionic contaminants)        |
| D1          | ~1340-1350                           | In-plane imperfections in such as defects in the graphitic lattice or graphene layers and heteroatoms                           |
| D3          | ~1500-1530                           | Organic molecules, fragments or functional groups in poorly organized materials (amorphous carbon) responsible for active sites |
| G           | ~1580                                | Graphitic structures (E <sub>2g</sub> symmetry)                                                                                 |
| D2          | ~1600-1620                           | Lattice vibration of disordered graphitic lattice involving graphene layers                                                     |

**Table S2.** The atomic percentage (%) results for the raw PP biomass and its derivatives performed by XPS analysis

| <b>Sample</b>         | <b>Carbon content (at.%)</b> | <b>Nitrogen content (at.%)</b> | <b>Sulphur content (at.%)</b> | <b>Sodium content (at.%)</b> | <b>Tantalum content (at.%)</b> | <b>Oxygen content (at.%)</b> |
|-----------------------|------------------------------|--------------------------------|-------------------------------|------------------------------|--------------------------------|------------------------------|
| raw PP                | 55.80                        | 0.55                           | 0.31                          | 3.90                         | -                              | 39.44                        |
| cell-PP               | 66.61                        | 0.11                           | 0.88                          | 5.90                         | -                              | 26.50                        |
| cell-PP-700           | 71.75                        | 0.21                           | 0.46                          | 4.32                         | -                              | 23.26                        |
| cell-PP-700-Ta        | 72.06                        | 0.65                           | 0.24                          | 7.98                         | 6.11                           | 12.96                        |
| cell-PP-700-Ta-900    | 71.99                        | 0.33                           | 0.11                          | 7.54                         | 6.48                           | 13.55                        |
| cell-PP-NS-700        | 67.13                        | 8.28                           | 4.55                          | 3.19                         | -                              | 16.85                        |
| cell-PP-NS-700-900    | 77.96                        | 1.14                           | 1.88                          | 3.99                         | -                              | 15.03                        |
| cell-PP-NS-700-Ta     | 66.36                        | 7.71                           | 4.70                          | 7.76                         | 4.89                           | 8.58                         |
| cell-PP-NS-700-Ta-900 | 69.11                        | 4.88                           | 3.04                          | 6.08                         | 6.17                           | 10.72                        |

**Table S3.** Ultimate analysis (wt%, daf) of raw PP biomass, cell-PP precursor and its derivatives

| <b>Sample</b>         | <b>C</b>   | <b>N</b>   | <b>H</b>  | <b>S</b>  | <b>O*</b>  |
|-----------------------|------------|------------|-----------|-----------|------------|
| raw PP                | 36.16±0.81 | 2.11±0.22  | 9.55±0.90 | 0.44±0.13 | 51.74±0.77 |
| cell-PP               | 47.06±0.55 | 1.11±0.13  | 6.89±0.77 | 1.18±0.11 | 43.76±1.13 |
| cell-PP-700           | 59.92±1.03 | 1.08±0.15  | 2.44±0.50 | 0.55±0.19 | 36.01±0.55 |
| cell-PP-NS-700        | 57.77±0.88 | 11.66±0.18 | 2.41±0.76 | 6.31±0.66 | 21.85±0.96 |
| cell-PP-NS-700-Ta     | 58.84±0.97 | 10.23±1.12 | 2.66±0.48 | 5.89±0.71 | 22.38±1.17 |
| cell-PP-700-Ta-900    | 72.05±0.77 | 0.88±0.25  | 3.71±0.11 | 0.50±0.11 | 22.86±0.44 |
| cell-PP-NS-700-Ta-900 | 71.18±0.49 | 4.16±0.80  | 2.08±0.63 | 2.53±0.32 | 20.05±0.81 |

\* by difference; daf: dry ash free

**Table S4.** Comparison of ORR catalytic properties of the cell-PP-NS-799-Ta-900 catalyst, Pt/C benchmark catalyst and other tantalum-contained electrocatalysts. Rotating disk electrode (RDE) results in terms of onset potential ( $E_{\text{onset}}$ ), half-wave potential ( $E_{1/2}$ ), and the limited current density ( $J_L$ ) in  $O_2$  saturated environments and 1600 rpm

| Catalyst                                                                                 | Test conditions                                                                    | $E_{\text{onset}}$<br>(V vs. RHE) | $E_{1/2}$<br>(V vs. RHE) | $J_L$<br>(mA $cm^{-2}$ ) | Ref.      |
|------------------------------------------------------------------------------------------|------------------------------------------------------------------------------------|-----------------------------------|--------------------------|--------------------------|-----------|
| Pt/C                                                                                     | 0.1 M KOH, 5 mV $s^{-1}$                                                           | 0.9420                            | 0.83                     | -5.73                    | Current   |
| Cell-PP-NS-700-Ta-900                                                                    | 0.1 M KOH, 5 mV $s^{-1}$                                                           | 0.931                             | 0.82                     | -5.24                    | work      |
| TaC <sub>x</sub> N <sub>y</sub> O <sub>z</sub> /MWCNT                                    | 0.1 M H <sub>2</sub> SO <sub>4</sub> , 5 mV $s^{-1}$                               | 0.900                             | 0.76                     | -3.12                    | <u>1</u>  |
| Core-shell TaON@CN-1000                                                                  | 0.1 M KOH, 10 mV $s^{-1}$<br>0.5 M H <sub>2</sub> SO <sub>4</sub> , 10 mV $s^{-1}$ | 0.800<br>0.700                    | 0.70<br>0.48             | -4.30<br>-2.50           | <u>2</u>  |
| Ta-CNO                                                                                   | 0.1 M H <sub>2</sub> SO <sub>4</sub> , 5 mV $s^{-1}$                               | 0.800                             | 0.72                     | -3.10                    | <u>3</u>  |
| TaO <sub>x</sub> /C900                                                                   | 0.5 M H <sub>2</sub> SO <sub>4</sub> , 5 mV $s^{-1a}$                              | 0.460                             | 0.32                     | -2.70                    | <u>4</u>  |
| TaO <sub>x</sub> /CB-873K, 2h                                                            | 0.1 M KOH, 5mV $s^{-1}$                                                            | 0.950                             | 0.73                     | -                        | <u>5</u>  |
| Pt/TaO <sub>x</sub> /GC                                                                  | 0.1 M HClO <sub>4</sub> , 5 mV $s^{-1}$                                            | 0.950                             | 0.80                     | -6.0                     | <u>6</u>  |
| Partially oxidized Ta-CN powders                                                         | 0.1 M H <sub>2</sub> SO <sub>4</sub> , 5 mV $s^{-1}$                               | 0.940                             | 0.60                     | -0.7                     | <u>7</u>  |
| TaO <sub>x</sub> N <sub>y</sub> -800                                                     | 0.1 M H <sub>2</sub> SO <sub>4</sub> , 5 mV $s^{-1}$                               | 0.750                             | 0.40                     | -                        | <u>8</u>  |
| Reduced Ta <sub>2</sub> O <sub>5</sub>                                                   | 0.1 M H <sub>2</sub> SO <sub>4</sub> , 5 mV $s^{-1}$                               | 0.800                             | 0.68                     | -                        | <u>9</u>  |
| TaO <sub>x</sub> in form of Na <sub>2</sub> Ta <sub>8</sub> O <sub>21-x</sub> /G900      | 0.5 M H <sub>2</sub> SO <sub>4</sub> , 5 mV $s^{-1}$                               | 0.800                             | 0.45                     | -1.0                     | <u>10</u> |
| Ta-CNO-1000C                                                                             | 0.1 M H <sub>2</sub> SO <sub>4</sub> , 5 mV $s^{-1}$                               | 0.800                             | 0.60                     | -                        | <u>11</u> |
| N-doped TaO <sub>x</sub> /RGO-775                                                        | 0.1 M KOH, 5mV $s^{-1}$                                                            | 0.880                             | 0.80                     | -4.4                     | <u>12</u> |
| TaO <sub>x</sub> in form of Na <sub>2</sub> Ta <sub>8</sub> O <sub>21-x</sub> /C-3%-1000 | 0.1 M KOH, 5mV $s^{-1}$                                                            | 0.800                             | 0.65                     | -2.0                     | <u>13</u> |

<sup>a</sup>A saturated calomel electrode (Hg|Hg<sub>2</sub>Cl<sub>2</sub>, sat. KCl) was used as the reference electrode

## References

- 1 N. Uehara, A. Ishihara, T. Nagai, M. Matsumoto, H. Imai, Y. Kohno, K. Matsuzawa, S. Mitsushima and K. Ota, Kinetic study of oxygen reduction reaction on tantalum oxide-based electrocatalysts produced from oxy-tantalum phthalocyanines in acidic media, *Electrochim. Acta* 2015, **182**, 789-794.
- 2 M. Wassner, M. Eckardt, C. Gebauer, G. R. Bourret, N. Hüsing and R. J. Behm, Synthesis and electrocatalytic performance of spherical core-shell tantalum (oxy)nitride@nitrided carbon composites in the oxygen reduction reaction, *Electrochim. Acta* 2017, **227**, 367-381.
- 3 K. Matsuzawa, K. Nozawa, K. Yamauchi, A. Ishihara, S. Mitsushima and K.-i. Ota, Immersed effects of Ta and Zr compounds on activity of oxygen reduction reaction in sulfuric acid, *J. Power Sources* 2013, **226**, 16-19.
- 4 D. Sebastián, V. Baglio, S. Sun, A. C. Tavares and A. S. Aricò, Facile synthesis of Zr- and Ta-based catalysts for the oxygen reduction reaction, *Chin. J. Catal.*, 2015, **36**, 484-489.
- 5 J. Seo, D. H. Anjum, K. Takanabe, J. Kubota and K. Domen, Electrodeposited Ultrafine TaOx/CB Catalysts for PEFC Cathode Application: Their Oxygen Reduction Reaction Kinetics, *Electrochim. Acta* 2014, **149**, 76-85.
- 6 Z. Awaludin, M. Suzuki, J. Masud, T. Okajima and T. Ohsaka, Enhanced Electrocatalysis of Oxygen Reduction on Pt/TaOx/GC, *J. Phys. Chem. C*, 2011, **115**, 25557-25567.
- 7 A. Ishihara, M. Tamura, K. Matsuzawa, S. Mitsushima and K.-i. Ota, Tantalum oxide-based compounds as new non-noble cathodes for polymer electrolyte fuel cell, *Electrochim. Acta* 2010, **55**, 7581-7589.
- 8 A. Ishihara, S. Doi, S. Mitsushima and K.-i. Ota, Tantalum (oxy)nitrides prepared using reactive sputtering for new nonplatinum cathodes of polymer electrolyte fuel cell, *Electrochim. Acta* 2008, **53**, 5442-5450.

- 9 Z. Awaludin, T. Okajima and T. Ohsaka, Preparation of reduced tantalum pentoxide by electrochemical technique for oxygen reduction reaction, *J. Power Sources* 2014, **268**, 728-732.
- 10 D. Sebastián, V. Baglio, S. Sun, A. C. Tavares and A. S. Aricò, Graphene-Supported Substoichiometric Sodium Tantalate as a Methanol-Tolerant, Non-Noble-Metal Catalyst for the Electroreduction of Oxygen, *ChemCatChem* 2015, **7**, 911-915.
- 11 A. Ishihara, M. Tamura, Y. Ohgi, M. Matsumoto, K. Matsuzawa, S. Mitsushima, H. Imai and K.-i. Ota, Emergence of Oxygen Reduction Activity in Partially Oxidized Tantalum Carbonitrides: Roles of Deposited Carbon for Oxygen-Reduction-Reaction-Site Creation and Surface Electron Conduction, *J. Phys. Chem. C*, 2013, **117**, 18837-18844.
- 12 X. Yang, Q. Mo, Y. Guo, N. Chen and Q. Gao, Reduced-graphene-oxide supported tantalum-based electrocatalysts: Controlled nitrogen doping and oxygen reduction reaction, *Appl. Surf. Sci.* , 2018, **434**, 243-250.
- 13 J. C. Ruiz-Cornejo, D. Sebastián, M. V. Martínez-Huerta and M. J. Lázaro, Tantalum-based electrocatalysts prepared by a microemulsion method for the oxygen reduction and evolution reactions, *Electrochim. Acta* 2019, **317**, 261-271.
